# Supplementary material
Source: Elsevier journal article supplement (https://www.sciencedirect.com/science/article/pii/S2254887421001120)
Supplement: mmc1 [file S2254887421001120:mmc1.pdf]

## **NEWCASTLE - OTTAWA QUALITY ASSESSMENT SCALE (MODIFIED) (Cohort studies) (Longitudinal studies)**

Wells G, Shea B, O'Connell D, Peterson J, Welch V, et al. The Newcastle-Ottawa scale (NOS) for assessing the quality of nonrandomised studies in meta-analyses. Ottawa Health Research Institute website. Available: [http://www.ohri.ca/programs/clinical\\_epidemiology/oxford.asp](http://www.ohri.ca/programs/clinical_epidemiology/oxford.asp). Accessed 16 August 2012

- (1) whether assessment of hepatitis B virus infection was based on laboratory data (yes) or administrative codes or others (no);
- (2) whether the diagnosis of chronic kidney disease was captured by assessment of GFR and proteinuria with laboratory data (yes) or administrative codes or others (no);
- (3) whether the results of confounding assessment were adjusted at least for age, and gender, and at least one other potential confounder either in the design phase or in the analysis (yes) or not (no);
- (4) whether the non exposed cohort was drawn from the same community as the exposed cohort (yes) or not (no);
- (5) whether the target population was clearly defined (yes), or on the contrary, based on convenience sampling of subjects such as patients of a single consultation or volunteers or not explained (no).

Throughout this assessment, when the information on a specific item was not provided by the authors, we graded this item as 'no'.

## **CC (Case Control) STUDIES**

### **Chen Y, et al. (BMC Nephrol, 2015)**

1 whether assessment of hepatitis B virus infection was based on laboratory data (yes) or administrative codes or others (no) 0;

2 whether diagnosis of chronic kidney disease was captured by assessment of GFR with laboratory data (yes) or others (no) 0;

3 whether results were adjusted for age, gender, and at least one other potential confounder either in the design phase or in the analysis (yes) or not (no) 1;

4 whether non exposed cohort was drawn from the same community as the exposed cohort (yes) or not (no) 1;

5 whether the target population was clearly defined (yes), or based on convenience sampling of subjects such as patients of a single consultation (no) 1;

### **Three points**

**Nguyen M, et al. (Hepatology, 2018)**

1 whether assessment of hepatitis B virus infection was based on laboratory data (yes) or administrative codes or others (no) 0;

2 whether diagnosis of chronic kidney disease was captured by assessment of GFR with laboratory data (yes) or others (no) 0;

3 whether results were adjusted for age, gender, and at least one other potential confounder either in the design phase or in the analysis (yes) or not (no) 1;

4 whether non exposed cohort was drawn from the same community as the exposed cohort (yes) or not (no) 1;

5 whether the target population was clearly defined (yes), or based on convenience sampling of subjects such as patients of a single consultation (no) 1;

**Three points**

**Su S, et al. (BMC Nephrol, 2015)**

1 whether assessment of hepatitis B virus infection was based on laboratory data (yes) or administrative codes or others (no) 0;

2 whether diagnosis of chronic kidney disease was captured by assessment of GFR with laboratory data (yes) or others (no) 1;

3 whether results were adjusted for age, gender, and at least one other potential confounder either in the design phase or in the analysis (yes) or not (no) 1;

4 whether non exposed cohort was drawn from the same community as the exposed cohort either in the design phase or in the analysis (yes) or not (no) 1;

5 whether the target population was clearly defined (yes), or based on convenience sampling of subjects such as patients of a single consultation (no) 1;

**Four points**

**Kim S, et al. (J Korean Med Sci 2018)**

1 whether assessment of hepatitis B virus infection was based on laboratory data (yes) or administrative codes or others (no) 1;

2 whether diagnosis of chronic kidney disease was captured by assessment of GFR with laboratory data (yes) or others (no) 1;

3 whether results were adjusted for age, gender, and at least one other potential confounder either in the design phase or in the analysis (yes) or not (no) 1;

4 whether non exposed cohort was drawn from the same community as the exposed cohort (yes) or not (no) 1;

5 whether the target population was clearly defined (yes), or based on convenience sampling of subjects such as patients of a single consultation (no) 0;

**Four points**

## **COHORT STUDIES**

### **Lo M, et al.(Diabetes Obes Metab, 2004)**

1 whether assessment of hepatitis B virus infection was based on laboratory data (yes) or administrative codes or others (no) 1;

2 whether diagnosis of chronic kidney disease was captured by assessment of GFR with laboratory data (yes) or others (no) 1;

3 whether results were adjusted for age, gender, and at least one other potential confounder either in the design phase or in the analysis (yes) or not (no) 1;

4 whether non exposed cohort was drawn from the same community as the exposed cohort (yes) or not (no) 1;

5 whether the target population was clearly defined (yes), or based on convenience sampling of subjects such as patients of a single consultation (no) 1;

**Five points**

**Cheng A, et al. (Diabetologia, 2006)**

- 1 whether assessment of hepatitis B virus infection was based on laboratory data (yes) or administrative codes or others (no) 1;
- 2 whether diagnosis of chronic kidney disease was captured by assessment of GFR with laboratory data (yes) or others (no) 1;
- 3 whether results were adjusted for age, gender, and at least one other potential confounder either in the design phase or in the analysis (yes) or not (no) 1;
- 4 whether non exposed cohort was drawn from the same community as the exposed cohort (yes) or not (no) 1;
- 5 whether the target population was clearly defined (yes), or based on convenience sampling of subjects such as patients of a single consultation (no) 1;

**Five points**

**Chen Y, et al. (Kidney Int, 2014)**

1 whether assessment of hepatitis B virus infection was based on laboratory data (yes) or administrative codes or others (not) 0;

2 whether diagnosis of chronic kidney disease was captured by assessment of GFR with laboratory data (yes) or others (no) 0;

3 whether results were adjusted for age, gender, and at least one other potential confounder (yes) either in the design phase or in the analysis (yes) or not (no) 1;

4 whether non exposed cohort was drawn from the same community as the exposed cohort (yes) or not (no) 1;

5 whether the target population was clearly defined (yes), or based on convenience sampling of subjects such as patients of a single consultation (no) 1;

**Three points**



**Lee J, et al. (PLos One, 2014)**

1 whether assessment of hepatitis B virus infection was based on laboratory data (yes) or administrative codes (no) or others 1;

2 whether diagnosis of chronic kidney disease was captured by assessment of GFR with laboratory data (yes) or others (no)1;

3 whether results were adjusted for age, gender, and at least one other potential confounder either in the design phase or in the analysis (yes) or not (no) 1;

4 whether non exposed cohort was drawn from the same community as the exposed cohort (yes) or not (no) 1;

5 whether the target population was clearly defined (yes), or based on convenience sampling of subjects such as patients of a single consultation (no) 1;

**Five points**

**Kong X et al. (*Chronic Dis Transl Med*, 2016)**

1 whether assessment of hepatitis B virus infection was based on laboratory data (yes) or administrative codes or others (no) 1;

2 whether diagnosis of chronic kidney disease was captured by assessment of GFR with laboratory data (yes) or others (no) 1;

3 whether results were adjusted for age, gender, and at least one other potential confounder either in the design phase or in the analysis (yes) or not (no) 1;

4 whether non exposed cohort was drawn from the same community as the exposed cohort (yes) or not (no) 1;

5 whether the target population was clearly defined (yes), or based on convenience sampling of subjects such as patients of a single consultation (no) 1;

**Five points**

**Chen Y, et al. (World J Gastroenterol, 2018)**

- 1 whether assessment of hepatitis B virus infection was based on laboratory data (yes) or administrative codes or others (no) 0;
- 2 whether diagnosis of chronic kidney disease was captured by assessment of GFR with laboratory data (yes) or others (no) 0;
- 3 whether results were adjusted for age, gender, and at least one other potential confounder (yes) either in the design phase or in the analysis (yes) or not (no) 1;
- 4 whether non exposed cohort was drawn from the same community as the exposed cohort (yes) or not (no) 1;
- 5 whether the target population was clearly defined (yes), or based on convenience sampling of subjects such as patients of a single consultation (no) 1;

**Three points**

**Hwang J, et al. (Medicine, 2016)**

1 whether assessment of hepatitis B virus infection was based on laboratory data (yes) or administrative codes or others (no) 0;

2 whether diagnosis of chronic kidney disease was captured by assessment of GFR with laboratory data (yes) or others (no) 0;

3 whether results were adjusted for age, gender, and at least one other potential confounder either in the design phase or in the analysis (yes) or not (no) 1;

4 whether non exposed cohort was drawn from the same community as the exposed cohort (yes) or not (no) 1;

5 whether the target population was clearly defined (yes), or based on convenience sampling of subjects such as patients of a single consultation (no) 1;

**Three points**

**Si J, et al. (BMC Medicine, 2018)**

- 1 whether assessment of hepatitis B virus infection was based on laboratory data (yes) or administrative codes or others (no) 1;
- 2 whether diagnosis of chronic kidney disease was captured by assessment of GFR with laboratory data (yes) or others (no) 0;
- 3 whether results were adjusted for age, gender, and at least one other potential confounder either in the design phase or in the analysis (yes) or not (no) 1;
- 4 whether non exposed cohort was drawn from the same community as the exposed cohort (yes) or not (no) 1;
- 5 whether the target population was clearly defined (yes), or based on convenience sampling of subjects such as patients of a single consultation (no) 1;

**Four points**

**Hong Y, et al. (BMC Nephrology, 2018)**

- 1 whether assessment of hepatitis B virus infection was based on laboratory data (yes) or administrative codes or others (no) 1;
- 2 whether diagnosis of chronic kidney disease was captured by assessment of GFR with laboratory data (yes) or others (no) 1;
- 3 whether results were adjusted for age, gender, and at least one other potential confounder either in the design phase or in the analysis (yes) or not (no) 1;
- 4 whether non exposed cohort was drawn from the same community as the exposed cohort (yes) or not (no) 1;
- 5 whether the target population was clearly defined (yes), or based on convenience sampling of subjects such as patients of a single consultation (no) 1;

**Five points**

**Fang J, et al. (Int J Rheum Dis, 2018)**

- 1 whether assessment of hepatitis B virus infection was based on laboratory data (yes) or administrative codes or others (no) 1;
- 2 whether diagnosis of chronic kidney disease was captured by assessment of GFR with laboratory data (yes) or others (no)1;
- 3 whether results were adjusted for age, gender, and at least one other potential confounder either in the design phase or in the analysis (yes) or not (no) 1;
- 4 whether non exposed cohort was drawn from the same community as the exposed cohort (yes) or not (no) 1;
- 5 whether the target population was clearly defined (yes), or based on convenience sampling of subjects such as patients of a single consultation (no) 1;

**Five points**

**Tartof S, et al. (Clin J Am Soc Nephrol, 2018)**

- 1 whether assessment of hepatitis B virus infection was based on laboratory data (yes) or administrative codes or others (no) 0;
- 2 whether diagnosis of chronic kidney disease was captured by assessment of GFR with laboratory data (yes) or others (no) 1;
- 3 whether results were adjusted for age, gender, and at least one other potential confounder (yes) 1;
- 4 whether non exposed cohort was drawn from the same community as the exposed cohort (yes) or not (no) 1;
- 5 whether the target population was clearly defined (yes), or based on convenience sampling of subjects such as patients of a single consultation (no) 1;

**Four points**



## **CROSS-SECTIONAL STUDIES**

### **Ishizaka N, et al. (Hepatol Res, 2008)**

1 whether assessment of hepatitis B virus infection was based on laboratory data (yes) or administrative codes or others (no) 1;

2 whether diagnosis of chronic kidney disease was captured by assessment of GFR with laboratory data (yes) or others (no) 1;

3 whether results were adjusted for age, gender, and at least one other potential confounder either in the design phase or in the analysis (yes) or not (no) 1;

4 whether non exposed cohort was drawn from the same community as the exposed cohort (yes) or not (no) 1;

5 whether the target population was clearly defined (yes), or based on convenience sampling of subjects such as patients of a single consultation (no) 1;

**Five points**

**Zhang L, et al. (Am J Kidney Dis, 2008)**

- 1 whether assessment of hepatitis B virus infection was based on laboratory data (yes) or administrative codes or others (no) 0;
- 2 whether diagnosis of chronic kidney disease was captured by assessment of GFR with laboratory data (yes) or others (no) 1;
- 3 whether results were adjusted for age, gender, and at least one other potential confounder either in the design phase or in the analysis (yes) or not (no) 1;
- 4 whether non exposed cohort was drawn from the same community as the exposed cohort (yes) or not (no) 1;
- 5 whether the target population was clearly defined (yes), or based on convenience sampling of subjects such as patients of a single consultation (no) 1;

**Four points**

**Lee J, et al. (Am J Kidney Dis, 2010)**

1 whether assessment of hepatitis B virus infection was based on laboratory data (yes) or administrative codes or others (no) 1;

2 whether diagnosis of chronic kidney disease was captured by assessment of GFR with laboratory data (yes) or others (no) 1;

3 whether results were adjusted for age, gender, and at least one other potential confounder either in the design phase or in the analysis (yes) or not (no) 1;

4 whether non exposed cohort was drawn from the same community as the exposed cohort (yes) or not (no) 1;

5 whether the target population was clearly defined (yes), or based on convenience sampling of subjects such as patients of a single consultation (no) 0;

**Four points**

**Cai J, et al. (Clin J Am Soc Nephrol, 2012)**

1 whether assessment of hepatitis B virus infection was based on laboratory data (yes) or administrative codes or others (no) 1;

2 whether diagnosis of chronic kidney disease was captured by assessment of GFR with laboratory data (yes) or others (no) 1;

3 whether results were adjusted for age, gender, and at least one other potential confounder either in the design phase or in the analysis (yes) or not (no) 1;

4 whether non exposed cohort was drawn from the same community as the exposed cohort (yes) or not (no) 1;

5 whether the target population was clearly defined (yes), or based on convenience sampling of subjects such as patients of a single consultation (no) 1;

**Five points**

**Lin M, et al. (Clin J Am Soc Nephrol, 2013)**

1 whether assessment of hepatitis B virus infection was based on laboratory data (yes) or administrative codes or others (no) 0;

2 whether diagnosis of chronic kidney disease was captured by assessment of GFR with laboratory data (yes) or others (no) 1;

3 whether results were adjusted for age, gender, and at least one other potential confounder either in the design phase or in the analysis (yes) or not (no) 1;

4 whether non exposed cohort was drawn from the same community as the exposed cohort (yes) or not (no) 1;

5 whether the target population was clearly defined (yes), or based on convenience sampling of subjects such as patients of a single consultation (no) 1;

**Four points**

**Senghore T, et al.(J Exp Clin Med, 2013)**

1 whether assessment of hepatitis B virus infection was based on laboratory data (yes) or administrative codes or others (no) 1;

2 whether diagnosis of chronic kidney disease was captured by assessment of GFR with laboratory data (yes) or others (no)1;

3 whether results were adjusted for age, gender, and at least one other potential confounder either in the design phase or in the analysis (yes) or not (no) 1;

4 whether non exposed cohort was drawn from the same community as the exposed cohort (yes) ort not (no) 1;

5 whether the target population was clearly defined (yes), or based on convenience sampling of subjects such as patients of a single consultation (no) 1;

**Five points**

**Zeng Q, et al.(Int Med Research, 2014)**

1 whether assessment of hepatitis B virus infection was based on laboratory data (yes) or administrative codes or others (no) 1;

2 whether diagnosis of chronic kidney disease was captured by assessment of GFR with laboratory data (yes) or others (no)1;

3 whether results were adjusted for age, gender, and at least one other potential confounder either in the design phase or in the analysis (yes) or not (no) 1;

4 whether non exposed cohort was drawn from the same community as the exposed cohort (yes) ort not (no) 1;

5 whether the target population was clearly defined (yes), or based on convenience sampling of subjects such as patients of a single consultation (no) 1;

**Five points**

**Du Y, et al. (Sci Rep, 2017)**

- 1 whether assessment of hepatitis B virus infection was based on laboratory data (yes) or administrative codes or others (no) 1;
- 2 whether diagnosis of chronic kidney disease was captured by assessment of GFR with laboratory data (yes) or others (no) 1;
- 3 whether results were adjusted for age, gender, and at least one other potential confounder either in the design phase or in the analysis (yes) or not (no) 1;
- 4 whether non exposed cohort was drawn from the same community as the exposed cohort (yes) or not (no) 1;
- 5 whether the target population was clearly defined (yes), or based on convenience sampling of subjects such as patients of a single consultation (no) 1;

**Five points**



**Lai T, et al.(Kidney Int, 2017)**

- 1 whether assessment of hepatitis B virus infection was based on laboratory data (yes) or administrative codes or others (no) 0;
- 2 whether diagnosis of chronic kidney disease was captured by assessment of GFR with laboratory data (yes) or others (no) 1;
- 3 whether results were adjusted for age, gender, and at least one other potential confounder either in the design phase or in the analysis (yes) or not (no) 1;
- 4 whether non exposed cohort was drawn from the same community as the exposed cohort (yes) or not (no) 1;
- 5 whether the target population was clearly defined (yes), or based on convenience sampling of subjects such as patients of a single consultation (no) 1;

**Four points**

**Huang J, et al.(J Int Med, 2006)**

1 whether assessment of hepatitis B virus infection was based on laboratory data (yes) or administrative codes or others (no) 1;

2 whether diagnosis of chronic kidney disease was captured by assessment of GFR with laboratory data (yes) or others (no) 1;

3 whether results were adjusted for age, gender, and at least one other potential confounder either in the design phase or in the analysis (yes) or not (no) 1;

4 whether non exposed cohort was drawn from the same community as the exposed cohort (yes) or not (no) 1;

5 whether the target population was clearly defined (yes), or based on convenience sampling of subjects such as patients of a single consultation (no) 0;

**Four points**

**Zhang H, et al (Sci Rep, 2019)**

- 1 whether assessment of hepatitis B virus infection was based on laboratory data (yes) or administrative codes or others (no) 1;
- 2 whether diagnosis of chronic kidney disease was captured by assessment of GFR with laboratory data (yes) or others (no) 1;
- 3 whether results were adjusted for age, gender, and at least one other potential confounder either in the design phase or in the analysis (yes) or not (no) 1;
- 4 whether non exposed cohort was drawn from the same community as the exposed cohort (yes) or not (no) 1;
- 5 whether the target population was clearly defined (yes), or based on convenience sampling of subjects such as patients of a single consultation (no) 0;

**Four points**
